# Supplementary material for: Decorating graphene oxide/nanogold with dextran-based polymer brushes for the construction of ultrasensitive electrochemical enzyme biosensors
Source: Royal Society of Chemistry journal article supplement (doi:10.1039/c5tb00451a), 2015-01-01
Supplement: c5tb00451a1.pdf [file c5tb00451a1.pdf]

## SUPPORTING INFORMATION

### Decorating graphene/nanogold with dextran-based polymer brushes for the construction of ultrasensitive electrochemical enzyme biosensors

Abderrahmane Boujakhrou,<sup>a</sup> Alfredo Sánchez,<sup>a</sup> Paula Díez,<sup>a</sup> Sandra Jimenez,<sup>a</sup> Paloma Martínez-Ruiz,<sup>b</sup> Miriam Peña-Álvarez,<sup>c</sup> José M. Pingarrón,<sup>\*a,d</sup> Reynaldo Villalonga<sup>\*a,d</sup>

<sup>a</sup>Department of Analytical Chemistry, <sup>b</sup>Department of Organic Chemistry I & <sup>c</sup>Department of Physical Chemistry I, Faculty of Chemistry, Complutense University of Madrid, 28040-Madrid Spain.

Fax: +34 913944329; Tel: +34 913944315; E-mail: pingarro@quim.ucm.es, rvillalonga@quim.ucm.es

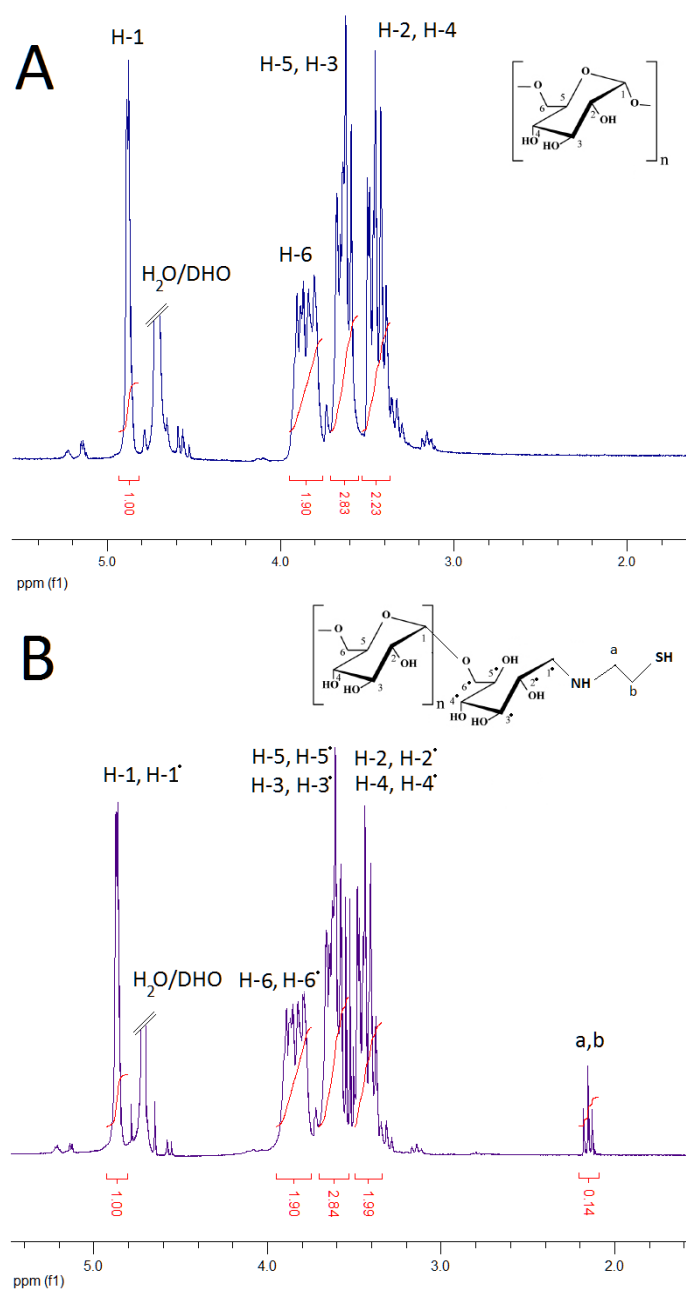

Figure 1S. <sup>1</sup>H-RMN spectra of dextran (A) and dextran-cysteamine (B).

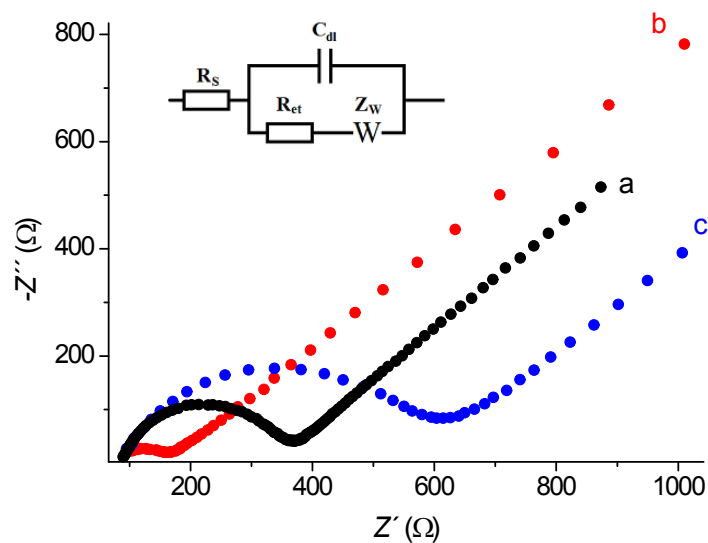

**Figure 2S.** Electrochemical impedance spectra obtained at a glassy carbon electrode before (a) and after coating with Dex-Au-Sil-rGO (b) and further immobilization of tyrosinase (c), in 0.1 M KCl solution containing 5 mM K<sub>3</sub>[Fe(CN)<sub>6</sub>]/K<sub>4</sub>[Fe(CN)<sub>6</sub>] (1:1).

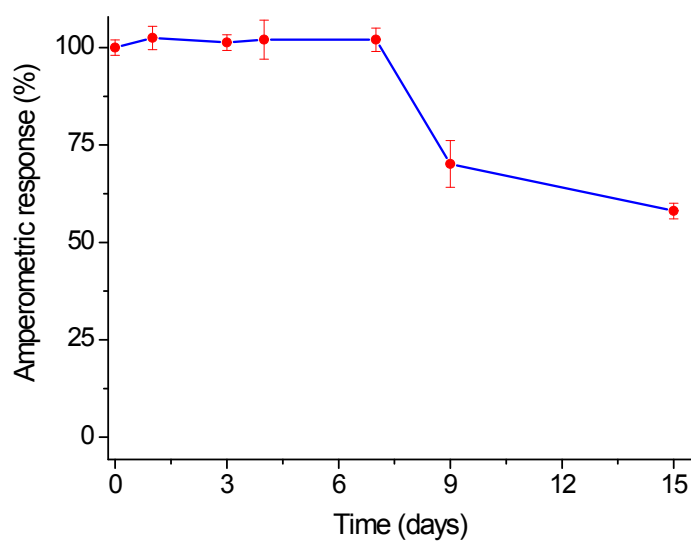

**Figure 3S.** Effect of time of storage at 4°C on the amperometric response of the biosensor.

**Table 1S.** Analytical properties of graphene-based tyrosinase biosensors for catechol.

| <b>Electrode</b>                          | <b>Linear Range (M)</b>                     | <b>Limit of Detection (M)</b> | <b>Sensitivity (mA·M<sup>-1</sup> / A·M<sup>-1</sup>·cm<sup>-2</sup>)</b> |
|-------------------------------------------|---------------------------------------------|-------------------------------|---------------------------------------------------------------------------|
| <b>Tyr-Au/PBA-GO/SPE<sup>1</sup></b>      | 8.3x10 <sup>-8</sup> – 2.3x10 <sup>-5</sup> | 2.4x10 <sup>-8</sup>          | 160 / 5.16                                                                |
| <b>Tyr-GR-SP/ GCE<sup>2</sup></b>         | 1x10 <sup>-9</sup> – 1.7x10 <sup>-5</sup>   | 2.3x10 <sup>-10</sup>         | -                                                                         |
| <b>Tyr/TNT/GNPs/GCE<sup>3</sup></b>       | 3x10 <sup>-7</sup> – 1.1x10 <sup>-4</sup>   | 5.5x10 <sup>-8</sup>          | 150 / 2.14                                                                |
| <b>Tyr/GR-chitosan/GCE<sup>4</sup></b>    | 1x10 <sup>-6</sup> – 4x10 <sup>-4</sup>     | 7.5x10 <sup>-7</sup>          | 69 / 0.99                                                                 |
| <b>Tyr/PAMAM- rGO/GCE<sup>5</sup></b>     | 1x10 <sup>-8</sup> – 2.2x10 <sup>-5</sup>   | 6x10 <sup>-9</sup>            | 424 / 6.06                                                                |
| <b>Tyr/rGO/SPE<sup>6</sup></b>            | 2x10 <sup>-6</sup> –1.6x10 <sup>-5</sup>    | 1x10 <sup>-11</sup>           | 89.8 / -                                                                  |
| <b>Tyr/CMC-rGO/GCE<sup>7</sup></b>        | 2x10 <sup>-6</sup> –5.6x10 <sup>-5</sup>    | 2x10 <sup>-10</sup>           | 270 / 3.86                                                                |
| <b>Tyr/Dex-Au-Sil-rGO/GCE (this work)</b> | 1x10 <sup>-10</sup> – 1.2x10 <sup>-7</sup>  | 4x10 <sup>-11</sup>           | 45900 / 656                                                               |

Tyr: tyrosinase; Au: Au nanoparticles; PBA: 1-pyrenebutanoic acid; GO: graphene oxide; SPE: screen-printed electrode; GR: graphene; SP: silk peptide; TNT: TiO<sub>2</sub> nanotubes; GNPs: graphene nanoplatelets; GCE: glassy carbon electrode; PAMAM: PAMAM G-4 dendrimer; rGO: reduced graphene oxide; CMC: carboxymethyl cellulose; Dex: dextran; Sil: 3-mercaptopropyl trimethoxysilane.

## References

- 1 W. Song, D.W. Li, Y.T. Li, Y. Li, Y.T. Long, *Biosens. Bioelectron.*, 2011, **26**, 3181.
- 2 Y. Qu, M. Ma, Z. Wang, G. Zhan, B. Li, X. Wang, H. Fang, H. Zhang, C. Li, *Biosens. Bioelectron.*, 2013, **44**, 85.
- 3 X. Liu, R. Yan, J. Zhu, J. Zhang, X. Liu, *Sensor. Actuat. B Chem.*, 2015, 209, 328.
- 4 H. Yin, Q. Zhang, Y. Zhou, Q. Ma, T. Liu, L. Zhu, S. Ai, *Electrochim. Acta*, 2011, 56, 2748.
- 5 E. Araque, R. Villalonga, M. Gamella, P. Martinez-Ruiz, J. Reviejo, J. M. Pingarron, *J. Mater. Chem. B*, 2013, **1**, 2289.
- 6 L. Baptista-Pires, B. Pérez-López, C. C. Mayorga-Martinez, E. Morales-Narváez, N. Domingo, M. J. Esplandiu, F. Alzina, C. M. Sotomayor-Torres, A. Merkoçi; *Biosens. Bioelectron.*, 2014, **61**, 655.
- 7 E. Araque, R. Villalonga, M. Gamella, P. Martinez-Ruiz, A. Sanchez, V. Garcia-Baonza, J. M. Pingarron, *ChemPlusChem*, 2014, **79**, 1334.
